# Supplementary material
Source: ML conference proceedings conference paper supplement (https://proceedings.mlr.press/v139/fan21a.html)
Supplement: Supplementary file [file fan21a-supp.pdf]

---

# Supplementary material: Poisson-randomised DirBN: large mutation is needed in Dirichlet belief networks

---

**Xuhui Fan**

UNSW Data Science Hub, and School of Mathematics and Statistics, University of New South Wales  
xuhui.fan@unsw.edu.au

**Bin Li**

Shanghai Key Laboratory of IIP, School of Computer Science, Fudan University  
libin@fudan.edu.cn

**Yaqiong Li**

Australian Artificial Intelligence Institute, University of Technology, Sydney  
yaqiong.li@student.uts.edu.au

**Scott A. Sisson**

UNSW Data Science Hub, and School of Mathematics and Statistics, University of New South Wales  
scott.sisson@unsw.edu.au

## 1 Integer variable sampling for deep stochastic integer networks

In this section, we present the detail calculation of integer variable sampling for deep stochastic integer networks. The other random variables are the same as Pois-DirBN.

**Sampling**  $C_{ik i'}^{(l+\frac{1}{2})}$  The posterior probability involving  $C_{ik i'}^{(l+\frac{1}{2})}$ ,  $\boldsymbol{\pi}_i^{(l)}$ ,  $\boldsymbol{\pi}_{i'}^{(l+1)}$  is:

$$\begin{aligned}
& P(C_{ik i'}^{(l+\frac{1}{2})}, \boldsymbol{\pi}_i^{(l)}, \boldsymbol{\pi}_{i'}^{(l+1)} | -) \\
& \propto P(\boldsymbol{\pi}_i^{(l)} | \mathbf{C}^{(l-\frac{1}{2})}, \mathbf{D}^{(l-\frac{1}{2})}) P(C_{ik \cdot}^{(l+\frac{1}{2})} | \boldsymbol{\pi}_i^{(l)}) P(D_{ik \cdot}^{(l+\frac{1}{2})} | \boldsymbol{\pi}_i^{(l)}) P(\boldsymbol{\pi}_{i'}^{(l+1)} | \mathbf{C}^{(l+\frac{1}{2})}, \mathbf{D}^{(l+\frac{1}{2})}) P(C_{i'k \cdot}^{(l+\frac{3}{2})} | \boldsymbol{\pi}_{i'}^{(l+1)}) P(D_{i'k \cdot}^{(l+\frac{3}{2})} | \boldsymbol{\pi}_{i'}^{(l+1)}) \\
& \propto \left[ \prod_k [\pi_{ik}^{(l)}]^{\alpha_k^{(\pi)} + \sum_{i''} C_{i''ki'}^{(l-\frac{1}{2})} + \sum_{k''} D_{ik''k}^{(l-\frac{1}{2})} - 1} \right] \left[ \frac{(\sum_k C_{ik \cdot}^{(l+\frac{1}{2})})!}{C_{ik \cdot}^{(l+\frac{1}{2})}!} \prod_k [\pi_{ik}^{(l)}]^{C_{ik \cdot}^{(l+\frac{1}{2})}} \right] \left[ \prod_k [\pi_{ik}^{(l)}]^{D_{ik \cdot}^{(l+\frac{1}{2})}} \right] \\
& \cdot \left[ \frac{\Gamma(\sum_k (\alpha_k^{(\pi)} + \sum_{i''} C_{i''ki'}^{(l+\frac{1}{2})} + \sum_{k''} D_{i'k''k}^{(l+\frac{1}{2})}))}{\Gamma(\alpha_k^{(\pi)} + \sum_{i''} C_{i''ki'}^{(l+\frac{1}{2})} + \sum_{k''} D_{i'k''k}^{(l+\frac{1}{2})})} \prod_k [\pi_{i'k}^{(l+1)}]^{\alpha_k^{(\pi)} + \sum_{i''} C_{i''ki'}^{(l+\frac{1}{2})} + \sum_{k''} D_{i'k''k}^{(l+\frac{1}{2})} - 1} \right] \\
& \cdot \left[ \prod_k [\pi_{i'k}^{(l+1)}]^{C_{i'k \cdot}^{(l+\frac{3}{2})} + D_{i'k \cdot}^{(l+\frac{3}{2})}} \right] e^{-M} \frac{M^{\sum_k C_{ik \cdot}^{(l+\frac{1}{2})}}}{(\sum_k C_{ik \cdot}^{(l+\frac{1}{2})})!} \cdot \frac{C_{ik \cdot}^{(l+\frac{1}{2})}!}{C_{ik i'}^{(l+\frac{1}{2})}!} [\omega_{i i'}]^{C_{ik i'}^{(l+\frac{1}{2})}} \\
& \propto \prod_k [\pi_{ik}^{(l)}]^{\alpha_k^{(\pi)} + \sum_{i''} C_{i''ki'}^{(l-\frac{1}{2})} + \sum_{k''} D_{ik''k}^{(l-\frac{1}{2})} + C_{ik \cdot}^{(l+\frac{1}{2})} + D_{ik \cdot}^{(l+\frac{1}{2})} - 1} \prod_k [\pi_{i'k}^{(l+1)}]^{\alpha_k^{(\pi)} + \sum_{i''} C_{i''ki'}^{(l+\frac{1}{2})} + \sum_{k''} D_{i'k''k}^{(l+\frac{1}{2})} + C_{i'k \cdot}^{(l+\frac{3}{2})} + D_{i'k \cdot}^{(l+\frac{3}{2})} - 1} \\
& \cdot \left[ \frac{\Gamma(\sum_k (\alpha_k^{(\pi)} + \sum_{i''} C_{i''ki'}^{(l+\frac{1}{2})} + \sum_{k''} D_{i'k''k}^{(l+\frac{1}{2})}))}{\Gamma(\alpha_k^{(\pi)} + \sum_{i''} C_{i''ki'}^{(l+\frac{1}{2})} + \sum_{k''} D_{i'k''k}^{(l+\frac{1}{2})})} \right] \cdot \frac{[M \omega_{i i'}]^{C_{ik i'}^{(l+\frac{1}{2})}}}{C_{ik i'}^{(l+\frac{1}{2})}!} \tag{1}
\end{aligned}$$

By integrating out  $\pi_i^{(l)}, \pi_{i'}^{(l+1)}$ , we get the posterior ratio for  $C_{iki'}^{(l+\frac{1}{2})}$ :

$$\begin{aligned}
P(C_{iki'}^{(l+\frac{1}{2})} | -) &= \int_{\pi_i^{(l)}, \pi_{i'}^{(l+1)}} P(C_{iki'}^{(l+\frac{1}{2})}, \pi_i^{(l)}, \pi_{i'}^{(l+1)} | -) d\pi_i^{(l)} d\pi_{i'}^{(l+1)} \\
&\propto \frac{[M\omega_{ii'}] C_{iki'}^{(l+\frac{1}{2})}}{C_{iki'}^{(l+\frac{1}{2})}!} \cdot \frac{\Gamma(\alpha_k^{(\pi)} + \sum_{i''} C_{i''ki}^{(l-\frac{1}{2})} + \sum_{k''} D_{ik''k}^{(l-\frac{1}{2})} + C_{ik\cdot}^{(l+\frac{1}{2})} + D_{ik\cdot}^{(l+\frac{1}{2})})}{\Gamma(\sum_k [\alpha_k^{(\pi)} + \sum_{i''} C_{i''ki}^{(l-\frac{1}{2})} + \sum_{k''} D_{ik''k}^{(l-\frac{1}{2})} + C_{ik\cdot}^{(l+\frac{1}{2})} + D_{ik\cdot}^{(l+\frac{1}{2})})})} \\
&\cdot \left[ \frac{\Gamma(\alpha_k^{(\pi)} + \sum_{i''} C_{i''ki'}^{(l+\frac{1}{2})} + \sum_{k''} D_{i'k''k}^{(l+\frac{1}{2})} + C_{i'k\cdot}^{(l+\frac{3}{2})} + D_{i'k\cdot}^{(l+\frac{3}{2})})}{\Gamma(\sum_k [\alpha_k^{(\pi)} + \sum_{i''} C_{i''ki'}^{(l+\frac{1}{2})} + \sum_{k''} D_{i'k''k}^{(l+\frac{1}{2})} + C_{i'k\cdot}^{(l+\frac{3}{2})} + D_{i'k\cdot}^{(l+\frac{3}{2})})})} \right] \\
&\cdot \left[ \frac{\Gamma(\sum_k (\alpha_k^{(\pi)} + \sum_{i''} C_{i''ki'}^{(l+\frac{1}{2})} + \sum_{k''} D_{i'k''k}^{(l+\frac{1}{2})}))}{\Gamma(\alpha_k^{(\pi)} + \sum_{i''} C_{i''ki'}^{(l+\frac{1}{2})} + \sum_{k''} D_{i'k''k}^{(l+\frac{1}{2})})} \right] \tag{2}
\end{aligned}$$

Thus, when  $0 < l < L - 1$ , the posterior ratio of  $C_{iki'}^{(l+\frac{1}{2})}$  is:

$$P(C_{iki'}^{(l+\frac{1}{2})} | -) \propto \frac{[\omega_{ii'} M_c] C_{iki'}^{(l+\frac{1}{2})}}{C_{iki'}^{(l+\frac{1}{2})}!} \frac{\Gamma(\sum_{k''} v_{k''}^{(0)})}{\Gamma(v_k^{(0)})} \cdot \frac{\Gamma(v_k^{(1)})}{\Gamma(\sum_{k''} v_{k''}^{(1)})} \cdot \frac{\Gamma(v_k^{(2)})}{\Gamma(\sum_{k''} v_{k''}^{(2)})}$$

where  $v_k^{(0)} = \alpha_k^{(\pi)} + \sum_{i''} C_{i''ki'}^{(l+\frac{1}{2})} + \sum_{k''} D_{i'k''k}^{(l+\frac{1}{2})}$ ,  $v_k^{(1)} = \alpha_k^{(\pi)} + \sum_{i''} C_{i''ki}^{(l-\frac{1}{2})} + \sum_{k''} D_{ik''k}^{(l-\frac{1}{2})} + \sum_{i''} C_{iki''}^{(l+\frac{1}{2})} + \sum_{k''} D_{ikk''}^{(l+\frac{1}{2})}$ ,  $v_k^{(2)} = \alpha_k^{(\pi)} + \sum_{i''} C_{i''ki'}^{(l+\frac{1}{2})} + \sum_{k''} D_{i'k''k}^{(l+\frac{1}{2})} + \sum_{i''} C_{i'ki''}^{(l+\frac{3}{2})} + \sum_{k''} D_{i'kk''}^{(l+\frac{3}{2})}$ .

We can use similar techniques as in the main paper, to augment the second term  $\frac{\Gamma(\sum_{k''} v_{k''}^{(0)})}{\Gamma(v_k^{(0)})}$  in the r.h.s. of the above equation. For the third and fourth term, we can use Beta random variables to augment these Gamma ratios.

When  $l = 0$ , the posterior ratio of  $C_{iki'}^{(\frac{1}{2})}$  is:

$$P(C_{iki'}^{(\frac{1}{2})} | -) \propto \frac{[\omega_{ii'} M_c] C_{iki'}^{(\frac{1}{2})}}{C_{iki'}^{(\frac{1}{2})}!} \frac{\Gamma(\sum_{k''} v_{k''}^{(0)})}{\Gamma(v_k^{(0)})} \cdot \frac{\Gamma(v_k^{(1)})}{\Gamma(\sum_{k''} v_{k''}^{(1)})} \cdot \frac{\Gamma(v_k^{(2)})}{\Gamma(\sum_{k''} v_{k''}^{(2)})}$$

where  $v_k^{(0)} = \alpha_k^{(\pi)} + \sum_{i''} C_{i''ki'}^{(\frac{1}{2})} + \sum_{k''} D_{i'k''k}^{(\frac{1}{2})}$ ,  $v_k^{(1)} = \alpha_k^{(\pi)} + \sum_{i''} C_{iki''}^{(\frac{1}{2})} + \sum_{k''} D_{ikk''}^{(\frac{1}{2})}$ ,  $v_k^{(2)} = \alpha_k^{(\pi)} + \sum_{i''} C_{i''ki'}^{(\frac{1}{2})} + \sum_{k''} D_{i'k''k}^{(\frac{1}{2})} + \sum_{i''} C_{i'ki''}^{(\frac{3}{2})} + \sum_{k''} D_{i'kk''}^{(\frac{3}{2})}$ .

When  $l = L - 1$ , the posterior ratio of  $C_{iki'}^{(L-\frac{1}{2})}$  is:

$$P(C_{iki'}^{(L-\frac{1}{2})} | -) \propto \frac{[\omega_{ii'} M_c] C_{iki'}^{(L-\frac{1}{2})}}{C_{iki'}^{(L-\frac{1}{2})}!} \frac{\Gamma(\sum_{k''} v_{k''}^{(0)})}{\Gamma(v_k^{(0)})} \cdot \frac{\Gamma(v_k^{(1)})}{\Gamma(\sum_{k''} v_{k''}^{(1)})} \cdot \frac{\Gamma(v_k^{(2)})}{\Gamma(\sum_{k''} v_{k''}^{(2)})}$$

where  $v_k^{(0)} = \alpha_k^{(\pi)} + \sum_{i''} C_{i''ki'}^{(L-\frac{1}{2})} + \sum_{k''} D_{i'k''k}^{(L-\frac{1}{2})}$ ,  $v_k^{(1)} = \alpha_k^{(\pi)} + \sum_{i''} C_{i''ki}^{(l-\frac{3}{2})} + \sum_{k''} D_{ik''k}^{(l-\frac{3}{2})} + \sum_{i''} C_{iki''}^{(L-\frac{1}{2})} + \sum_{k''} D_{ikk''}^{(L-\frac{1}{2})}$ ,  $v_k^{(2)} = \alpha_k^{(\pi)} + \sum_{i''} C_{i''ki'}^{(L-\frac{1}{2})} + \sum_{k''} D_{i'k''k}^{(L-\frac{1}{2})} + X_{i'k}$ .

**Sampling  $D_{ikk'}$**  Similarly, when  $0 < l < L - 1$ , the posterior ratio of  $D_{ikk'}^{(l+\frac{1}{2})}$  is expressed as:

$$P(D_{ikk'}^{(l+\frac{1}{2})} | -) \propto \frac{[\phi_{kk'} M_d] D_{ikk'}^{(l+\frac{1}{2})}}{D_{ikk'}^{(l+\frac{1}{2})}!} \frac{\Gamma(\sum_{k''} v_{k''}^{(0)})}{\Gamma(v_k^{(0)})} \cdot \frac{\Gamma(v_k^{(1)})}{\Gamma(\sum_{k''} v_{k''}^{(1)})} \cdot \frac{\Gamma(v_k^{(2)})}{\Gamma(\sum_{k''} v_{k''}^{(2)})}$$

where  $v_{k'}^{(0)} = \alpha_{k'}^{(\pi)} + \sum_{i''} C_{i''k'i}^{(l+\frac{1}{2})} + \sum_{k''} D_{ik''k'}^{(l+\frac{1}{2})}$ ,  $v_k^{(1)} = \alpha_k^{(\pi)} + \sum_{i''} C_{i''ki}^{(l-\frac{1}{2})} + \sum_{k''} D_{ik''k}^{(l-\frac{1}{2})} + \sum_{i''} C_{iki''}^{(l+\frac{1}{2})} + \sum_{k''} D_{ikk''}^{(l+\frac{1}{2})}$ ,  $v_{k'}^{(2)} = \alpha_{k'}^{(\pi)} + \sum_{i''} C_{i''k'i}^{(l+\frac{1}{2})} + \sum_{k''} D_{ik''k'}^{(l+\frac{1}{2})} + \sum_{i''} C_{i'ki''}^{(l+\frac{3}{2})} + \sum_{k''} D_{i'kk''}^{(l+\frac{3}{2})}$ .

When  $l = 0$ , the posterior ratio of  $D_{ikk'}^{(\frac{1}{2})}$  is:

$$P(D_{ikk'}^{(\frac{1}{2})} | -) \propto \frac{[\phi_{kk'} M_d] D_{ikk'}^{(\frac{1}{2})}}{D_{ikk'}^{(\frac{1}{2})}!} \frac{\Gamma(\sum_{k''} v_{k''}^{(0)})}{\Gamma(v_k^{(0)})} \cdot \frac{\Gamma(v_k^{(1)})}{\Gamma(\sum_{k''} v_{k''}^{(1)})} \cdot \frac{\Gamma(v_k^{(2)})}{\Gamma(\sum_{k''} v_{k''}^{(2)})}$$

where  $v_{k'}^{(0)} = \alpha_{k'}^{(\pi)} + \sum_{i''} C_{i''k'i}^{(\frac{1}{2})} + \sum_{k''} D_{ik''k'}^{(\frac{1}{2})}$ ,  $v_k^{(1)} = \alpha_k^{(\pi)} + \sum_{i''} C_{ik'i''}^{(\frac{1}{2})} + \sum_{k''} D_{ik'k''}^{(\frac{1}{2})}$ ,  $v_{k'}^{(2)} = \alpha_{k'}^{(\pi)} + \sum_{i''} C_{i''k'i}^{(\frac{1}{2})} + \sum_{k''} D_{ik''k'}^{(\frac{1}{2})} + \sum_{i'''} C_{i''k'i'''}^{(\frac{3}{2})} + \sum_{k'''} D_{ik''k'''}^{(\frac{3}{2})}$ .

When  $l = L - 1$ , the posterior ratio of  $D_{ikk'}^{(L-\frac{1}{2})}$  is:

$$P(D_{ikk'}^{(L-\frac{1}{2})} | -) \propto \frac{[\phi_{kk'} M_d]^{D_{ikk'}^{(L-\frac{1}{2})}}}{D_{ikk'}^{(L-\frac{1}{2})}!} \cdot \frac{\Gamma(\sum_{k''} v_{k''}^{(0)})}{\Gamma(v_{k'}^{(0)})} \cdot \frac{\Gamma(v_k^{(1)})}{\Gamma(\sum_{k''} v_{k''}^{(1)})} \cdot \frac{\Gamma(v_{k'}^{(2)})}{\Gamma(\sum_{k''} v_{k''}^{(2)})}$$

where  $v_{k'}^{(0)} = \alpha_{k'}^{(\pi)} + \sum_{i''} C_{i''k'i}^{(L-\frac{1}{2})} + \sum_{k''} D_{ik''k'}^{(L-\frac{1}{2})}$ ,  $v_k^{(1)} = \alpha_k^{(\pi)} + \sum_{i''} C_{i''ki}^{(L-\frac{3}{2})} + \sum_{k''} D_{ik''k}^{(L-\frac{3}{2})} + \sum_{i'''} C_{i''ki'''}^{(L-\frac{1}{2})} + \sum_{k'''} D_{ik''k'''}^{(L-\frac{1}{2})}$ ,  $v_{k'}^{(2)} = \alpha_{k'}^{(\pi)} + \sum_{i''} C_{i''k'i}^{(L-\frac{1}{2})} + \sum_{k''} D_{ik''k'}^{(L-\frac{1}{2})} + X_{ik'}$ .

## 2 Running time results

**Per-iteration run time:** Figure 1 shows the running time per iteration for the four datasets. As we can see, our inference algorithm scales linearly with the number of layers. We might need around 15 hours for 1 000 MCMC iterations on the *PPI* data.

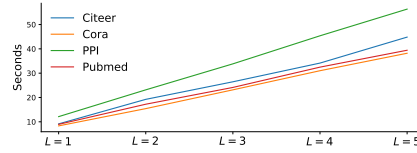

Figure 1: Per-iteration run time of Pois-DirBN-CD on the four real datasets.
